# Supplementary material
Source: Springer Nature journal article supplement (https://www.springermedizin.de/resource/supplementary/12936_2010_1620_MOESM2_ESM.pdf/9542166)

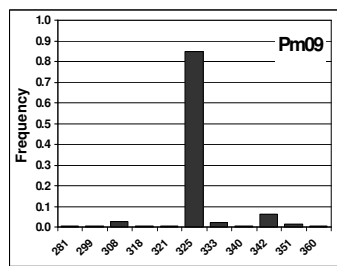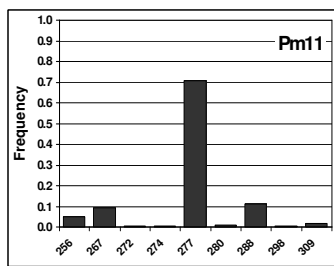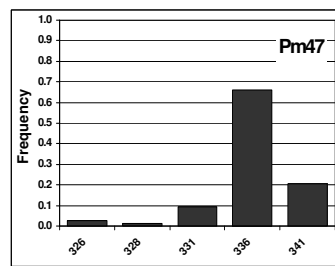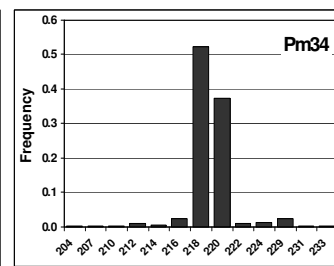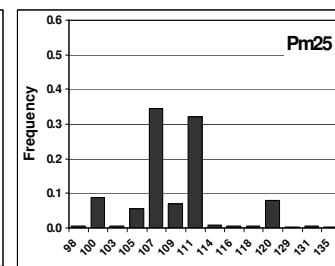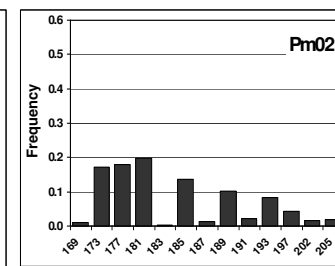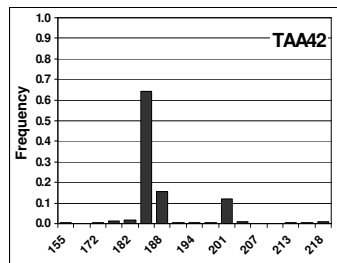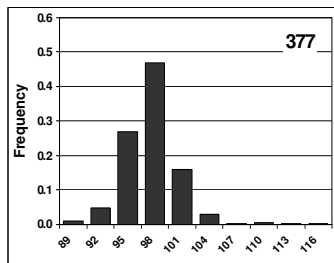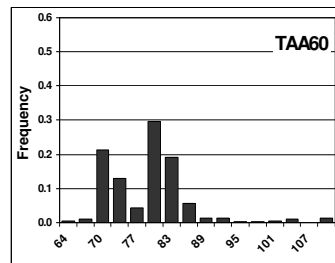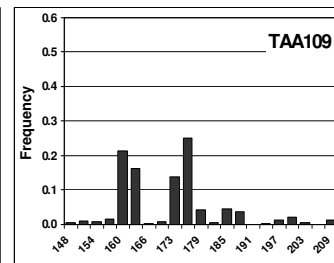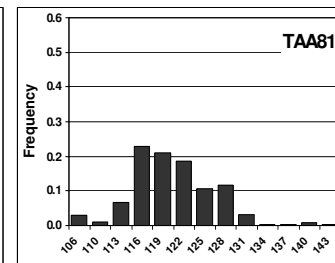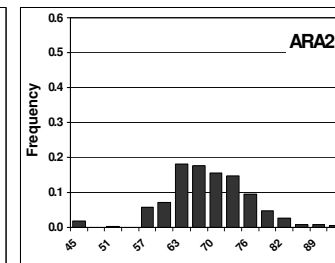

**Allele size (base pairs)**

Supplement: MOESM2 [file 9542166]
